# Supplementary material for: Effects of Bionic Pectoral Fin Rays’ Spanwise Flexibility on Forwarding Propulsion Performance
Source: MDPI journal article supplement (doi:10.3390/jmse10060783), 2022-06-06
Supplement: s1 [file s1]

Archive with 1 entries (1 files):
- jmse-1720067-supplementary.pdf
